# Supplementary material for: Expression of immune checkpoints and T cell exhaustion markers in early and advanced stages of colorectal cancer
Source: Springer Nature journal article supplement (doi:10.1007/s00262-020-02593-w), 2020-05-11

# Supplementary Figure 1

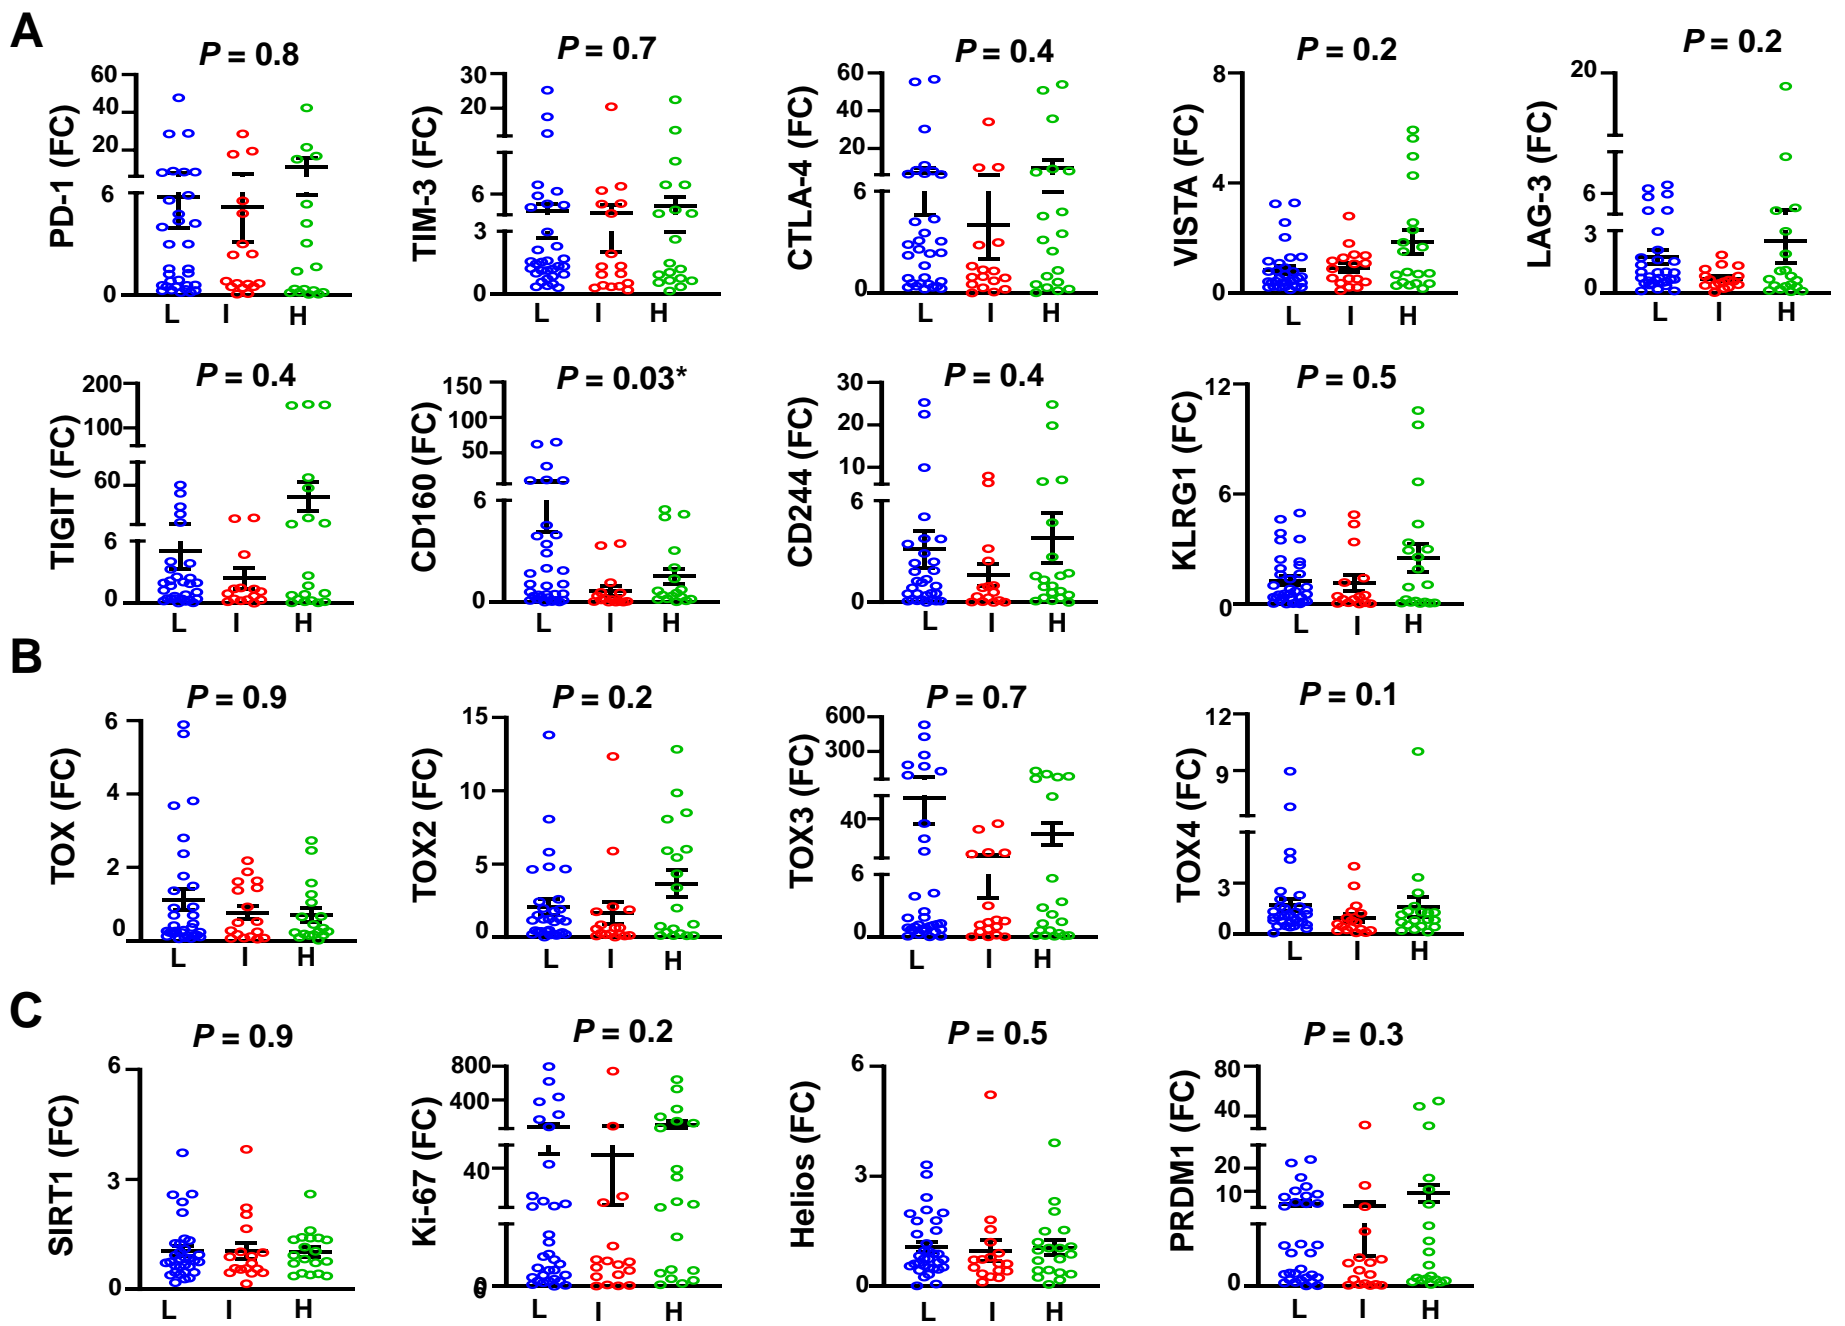

Supplement: MOESM1 [file 17970786]
