# Supplementary material for: Expression of immune checkpoints and T cell exhaustion markers in early and advanced stages of colorectal cancer
Source: Springer Nature journal article supplement (doi:10.1007/s00262-020-02593-w), 2020-05-11
Supplement: MOESM2 [file 17970786]

**Supplementary Table 1: Primer sequences used in the study****RT-qPCR primers**

| <b>Genes</b>   | <b>Forward primer (5'-3')</b> | <b>Reverse primer (5'-3')</b> |
|----------------|-------------------------------|-------------------------------|
| PD-1           | CCAGGATGGTTCTTAGACTCCC        | TTAGCACGAAGCTCTCCGAT          |
| TIM-3          | TCCAAGGATGCTTACCACCAG         | GCCAATGTGGATATTTGTGTTAGATT    |
| CTLA-4         | GCCCTGCACTCTCCTGTTTT          | GGTTGCCGCACAGACTTCA           |
| VISTA          | ACGCCGTATTCCCTGTATGTC         | TTGTAGAAGGTCACATCGTGC         |
| LAG-3          | GCGGGGACTTCTCGCTATG           | GGCTCTGAGAGATCCTGGGG          |
| TIGIT          | TCTGCATCTATCACACCTACCC        | CCACCACGATGACTGCTGT           |
| TOX            | TATGAGCATGACAGAGCCGAG         | GGAAGGAGGAGTAATTGGTGGGA       |
| TOX2           | AGAGCGAGAACAACGAAGACT         | TGGCCTGATAGGAGTAGGCAG         |
| TOX3           | CCTGCCAGCCTGGACTTC            | GAGGAGGCGTGATTGGTGG           |
| TOX4           | TGACAATTACCTGACGATCACAG       | TCCAAGGAGATAGGTGGGATTTC       |
| SIRT1          | TAGCCTTGTCAGATAAGGAAGGA       | ACAGCTTCACAGTCAACTTTGT        |
| Ki67           | ACGCCTGGTTACTATCAAAGG         | CAGACCCATTACTTGTGTTGGA        |
| Helios         | TCACCCGAAAGGGAGCACT           | CATGGCCCCTGATCTCATCTT         |
| CD244          | TCGTGATTCTAAGCGCACTGT         | CAGGTCTTGTGACGTGGGAG          |
| CD160          | GCTGAGGGGTTTGTAGTGTTT         | GTGTGACTTGGCTTATGGTGA         |
| KLRG1          | TCCATGTTAGAGTTGCCTACGG        | AAGTGGAGTAGTTGGAGCCCT         |
| PRDM1          | AAGCAACTGGATGCGCTATGT         | GGGATGGGCTTAATGGTGTAGAA       |
| $\beta$ -actin | AGAGCTACGAGCTGCCTGAC          | AGCACTGTGTTGGCGTACAG          |
